# Supplementary material for: Real-world evidence with a retrospective cohort of 15,968 COVID-19 hospitalized patients suggests 21 new effective treatments
Source: Springer Nature journal article supplement (doi:10.1186/s12985-023-02195-9), 2023-10-06
Supplement: MOESM1 [file 12985_2023_2195_MOESM1_ESM.pdf]

**Real-world evidence with a retrospective cohort of 15,968 COVID-19 hospitalized patients suggests 21 new effective treatments.**

Carlos Loucera, Rosario Carmona, Marina Esteban-Medina, Gerrit Bostelmann, Dolores Muñoyerro-Muñiz, Román Villegas, María Peña-Chilet, Joaquin Dopazo

### **Supplementary Material**

#### Contents

|                       |   |
|-----------------------|---|
| <b>Table S1</b> ..... | 2 |
| <b>Table S2</b> ..... | 3 |

**Table S1.** Data imported from BPS for each patient: code and definition of the variable.

| <b>Code</b>                                   | <b>Meaning</b>                                                                                                           |
|-----------------------------------------------|--------------------------------------------------------------------------------------------------------------------------|
| FECNAC                                        | Birth date                                                                                                               |
| FECDEF                                        | Death date                                                                                                               |
| SEXO                                          | Gender                                                                                                                   |
| FEC_INGRESO                                   | Hospital admission date                                                                                                  |
| FEC_ALTA                                      | Discharge date                                                                                                           |
| MOTIVO_ALTA                                   | Reason for the discharge: (recovery/death/admission in another hospital/voluntary discharge/retirement home/unspecified) |
| COD_PATOLOGIA_CRONICA                         | Hospital codes for chronic conditions                                                                                    |
| COD_FEC_INI_PATOLOGIA                         | Date of condition diagnosis                                                                                              |
| COD_CIE_NORMALIZADO                           | A mixture of ICD9 and ICD10 codes for diseases                                                                           |
| DESC_CIE_NORMALIZADO                          | Description of the ICD                                                                                                   |
| FECINI_DIAG                                   | Diagnosis date                                                                                                           |
| FECFIN_DIAG                                   | End of the diagnosed condition                                                                                           |
| FUENTE_DIAG                                   | Source of the diagnosis (hospital, emergency, etc.)                                                                      |
| IND_CRONICO_HCUP                              | Is a chronic disease? (yes/no)                                                                                           |
| Test COVID: FECHA                             | Test COVID date                                                                                                          |
| Test COVID: TYPE                              | PCR / antigens                                                                                                           |
| Test COVID:                                   | Result of the test (positive/negative)                                                                                   |
| RESULTADO_TEST                                |                                                                                                                          |
| Pharmacy (Hospital and external): DESCRIPCION | List of drugs used in hospital or purchased in the pharmacies                                                            |
| Pharmacy (Hospital and external): FECHA       | Dispensing date                                                                                                          |
| VACUNA                                        | List of vaccines                                                                                                         |
| VACUNAFECHA                                   | Vaccination dates                                                                                                        |
| COD_CLC                                       | List of analytical tests                                                                                                 |
| FEC_EXTRAE                                    | Analytic test date                                                                                                       |
| VALOR                                         | Analytic test value                                                                                                      |

**Table S2.** Log Hazard ratios obtained for the drugs tested, along with standard deviations (SDs), upper and lower coefficient intervals (CI), nominal and FDR-adjusted p-values. Also, Lymphocyte proliferation values (see Methods) along with standard deviations (SDs), upper and lower coefficient intervals (CI), nominal and FDR-adjusted p-values. The two last columns indicate the drugs used in the machine learning drug repurposing prediction study and the proteins targeted by the drug. Targets marked with an \* were those analyzed in the machine learning drug repurposing.

| Drugbank ID | name             | N    | LHR estimate | LHR SD  | LHR CI 5% | LHR CI 95% | LHR p-value | LHR FDR p-value | Lymphocyte counr | LC CI 5% | LC CI 95% | LC p-value | LC FDR p-value | ML prediction | Targets                                                                                                                                           |
|-------------|------------------|------|--------------|---------|-----------|------------|-------------|-----------------|------------------|----------|-----------|------------|----------------|---------------|---------------------------------------------------------------------------------------------------------------------------------------------------|
| DB00047     | Insulin glargine | 565  | -0.15163     | 0.10438 | -0.35620  | 0.05295    | 0.14631     | 0.27890         | 1.10043          | -0.00230 | 0.00816   | 0.27162    | 0.41946        | No            | IGF1R, INSR                                                                                                                                       |
| DB00115     | Cyanocobalamin   | 400  | -0.00558     | 0.14123 | -0.28238  | 0.27122    | 0.96850     | 0.97596         | 0.07283          | -0.00843 | 0.00903   | 0.94198    | 0.94198        | No            | MMAA, MMACHC, MMUT, MTHFR, MTR, MTRR                                                                                                              |
| DB00126     | Ascorbic acid    | 840  | -0.33321     | 0.10674 | -0.54241  | -0.12400   | 0.00180     | 0.01219         | 3.66682          | 0.00406  | 0.01344   | 0.00026    | 0.00127        | Yes           | P3H1*, P4HTM*, PHYH*, TMLHE*, ALKBH2, ALKBH3, BBOX1, DBH, EGLN1, EGLN2, EGLN3, KDM5D, OGFOD1, OGFOD2, P3H2, P3H3, P4HA1, PAM, PLOD1, PLOD2, PLOD3 |
| DB00128     | Aspartic acid    | 648  | -0.29845     | 0.13140 | -0.55598  | -0.04091   | 0.02313     | 0.06911         | 3.66511          | 0.00543  | 0.01791   | 0.00027    | 0.00127        | Yes           | ASNS*, ACY1, ADSS1, ADSS2, ASPA, ASPH, ASRGL1, ASS1, DARS1, DARS2, GOT1, GOT2, LYZ, PAICS, RNASE1, SLC1A1, SLC25A12, SLC25A13                     |
| DB00146     | Calcifediol      | 530  | -0.40717     | 0.15363 | -0.70827  | -0.10607   | 0.00804     | 0.03164         | 3.40110          | 0.00502  | 0.01869   | 0.00073    | 0.00328        | Yes           | VDR*                                                                                                                                              |
| DB00158     | Folic acid       | 624  | -0.01488     | 0.10223 | -0.21525  | 0.18549    | 0.88431     | 0.95713         | -0.66950         | -0.00805 | 0.00395   | 0.50345    | 0.63980        | Yes           | FOLR1*, FOLR2, FOLR3                                                                                                                              |
| DB00169     | Cholecalciferol  | 725  | -0.28067     | 0.10502 | -0.48651  | -0.07483   | 0.00753     | 0.03062         | 3.66953          | 0.00437  | 0.01440   | 0.00026    | 0.00127        | Yes           | VDR*                                                                                                                                              |
| DB00177     | Valsartan        | 383  | -0.12361     | 0.12964 | -0.37769  | 0.13047    | 0.34033     | 0.51259         | 1.85808          | -0.00034 | 0.01259   | 0.06391    | 0.14444        | Yes           | AGTR1*                                                                                                                                            |
| DB00178     | Ramipril         | 509  | -0.26557     | 0.11700 | -0.49489  | -0.03624   | 0.02323     | 0.06911         | 2.29420          | 0.00102  | 0.01294   | 0.02222    | 0.06025        | No            | ACE, BDKRB1                                                                                                                                       |
| DB00186     | Lorazepam        | 1057 | -0.22996     | 0.08503 | -0.39662  | -0.06330   | 0.00684     | 0.02879         | 1.16166          | -0.00180 | 0.00705   | 0.24568    | 0.39964        | No            | GABRA1, GABRA2, GABRA3, GABRA4, GABRA5, GABRA6, GABRB1, GABRB2, GABRB3, GABRD, GABRE, GABRG1, GABRG2, GABRG3, GABRP, GABRQ                        |

| Drugbank ID | name          | N    | LHR estimate | LHR SD  | LHR CI 5% | LHR CI 95% | LHR p-value | LHR FDR p-value | Lymphocyte counr | LC CI 5% | LC CI 95% | LC p-value | LC FDR p-value | ML prediction | Targets                                                                                                                                                                                                                                                                                          |
|-------------|---------------|------|--------------|---------|-----------|------------|-------------|-----------------|------------------|----------|-----------|------------|----------------|---------------|--------------------------------------------------------------------------------------------------------------------------------------------------------------------------------------------------------------------------------------------------------------------------------------------------|
| DB00193     | Tramadol      | 949  | -0.16897     | 0.08313 | -0.33191  | -0.00604   | 0.04209     | 0.11921         | 3.16350          | 0.00252  | 0.01072   | 0.00162    | 0.00636        | Yes           | SLC6A4 <sup>+</sup> , ADORA1, ADRA2A, ADRA2B, ADRA2C, CHRM1, CHRM3, GRIN1, GRIN2A, GRIN2B, GRIN2C, GRIN2D, GRIN3A, GRIN3B, HTR2C, OPRD1, OPRK1, OPRM1, SCN2A, SLC6A2, TACR1, TRPV1                                                                                                               |
| DB00207     | Azithromycin  | 2465 | -0.16216     | 0.05779 | -0.27542  | -0.04889   | 0.00502     | 0.02267         | 4.36750          | 0.00338  | 0.00888   | 0.00001    | 0.00018        | No            | PADI4                                                                                                                                                                                                                                                                                            |
| DB00213     | Pantoprazole  | 476  | 0.05155      | 0.10359 | -0.15149  | 0.25459    | 0.61874     | 0.78589         | 1.70433          | -0.00079 | 0.01131   | 0.08903    | 0.18727        | No            | ATP4A, DDAH1                                                                                                                                                                                                                                                                                     |
| DB00214     | Torasemide    | 278  | 0.07079      | 0.13233 | -0.18858  | 0.33016    | 0.59267     | 0.77748         | 1.21943          | -0.00296 | 0.01270   | 0.22380    | 0.37346        | No            | SLC12A1, SLC12A2                                                                                                                                                                                                                                                                                 |
| DB00215     | Citalopram    | 300  | -0.13647     | 0.14275 | -0.41625  | 0.14331    | 0.33907     | 0.51259         | 2.85283          | 0.00363  | 0.01967   | 0.00464    | 0.01666        | Yes           | HRH1 <sup>+</sup> , SLC6A4 <sup>+</sup>                                                                                                                                                                                                                                                          |
| DB00230     | Pregabalin    | 382  | 0.04019      | 0.11379 | -0.18284  | 0.26321    | 0.72397     | 0.85752         | -0.37733         | -0.00766 | 0.00518   | 0.70612    | 0.76659        | No            | CACNA2D1                                                                                                                                                                                                                                                                                         |
| DB00275     | Olmesartan    | 413  | -0.36562     | 0.12879 | -0.61803  | -0.11320   | 0.00453     | 0.02209         | 2.37903          | 0.00137  | 0.01416   | 0.01786    | 0.05002        | Yes           | AGTR1 <sup>+</sup>                                                                                                                                                                                                                                                                               |
| DB00316     | Acetaminophen | 7258 | -0.27573     | 0.04035 | -0.35481  | -0.19665   | 0.00000     | 0.00000         | 6.53570          | 0.00361  | 0.00671   | 0.00000    | 0.00000        | Yes           | PTGS2 <sup>+</sup> , PTGES3, PTGS1, TRPV1                                                                                                                                                                                                                                                        |
| DB00318     | Codeine       | 1019 | -0.29747     | 0.09647 | -0.48655  | -0.10840   | 0.00204     | 0.01247         | 3.92417          | 0.00441  | 0.01324   | 0.00009    | 0.00073        | No            | OPRD1, OPRK1, OPRM1                                                                                                                                                                                                                                                                              |
| DB00321     | Amitriptyline | 162  | 0.00881      | 0.18668 | -0.35708  | 0.37471    | 0.96235     | 0.97596         | 1.72008          | -0.00132 | 0.01939   | 0.08746    | 0.18719        | Yes           | HRH1 <sup>+</sup> , HTR1B <sup>+</sup> , NTRK1 <sup>+</sup> , SLC6A4 <sup>+</sup> , ADRA1A, ADRA1B, ADRA1D, ADRA2A, CHRM1, CHRM2, CHRM3, CHRM4, CHRM5, HRH2, HRH4, HTR1A, HTR1D, HTR2A, HTR2C, HTR6, HTR7, KCNA1, KCNH2, KCNH6, KCNH7, KCNQ2, KCNQ3, NTRK2, OPRD1, OPRK1, OPRM1, SIGMAR1, SLC6A2 |
| DB00331     | Metformin     | 1896 | -0.35648     | 0.06733 | -0.48845  | -0.22451   | 0.00000     | 0.00000         | 3.88744          | 0.00273  | 0.00827   | 0.00010    | 0.00073        | Yes           | GPD1 <sup>+</sup> , ETFDH, PRKAB1                                                                                                                                                                                                                                                                |
| DB00332     | Ipratropium   | 1322 | -0.04102     | 0.07479 | -0.18760  | 0.10557    | 0.58340     | 0.77364         | 5.03850          | 0.00632  | 0.01436   | 0.00000    | 0.00001        | No            | CHRM1, CHRM2, CHRM3                                                                                                                                                                                                                                                                              |
| DB00335     | Atenolol      | 187  | -0.31536     | 0.19350 | -0.69460  | 0.06389    | 0.10315     | 0.21696         | -0.60431         | -0.01264 | 0.00669   | 0.54638    | 0.66658        | No            | ADRB1, ADRB2                                                                                                                                                                                                                                                                                     |
| DB00338     | Omeprazole    | 5173 | -0.20373     | 0.04349 | -0.28897  | -0.11848   | 0.00000     | 0.00004         | 3.92296          | 0.00189  | 0.00566   | 0.00009    | 0.00073        | No            | AHR, ATP4A                                                                                                                                                                                                                                                                                       |
| DB00341     | Cetirizine    | 233  | -0.70557     | 0.22786 | -1.15217  | -0.25896   | 0.00196     | 0.01247         | 0.99063          | -0.00462 | 0.01405   | 0.32232    | 0.45199        | Yes           | HRH1 <sup>+</sup>                                                                                                                                                                                                                                                                                |

| Drugbank ID | name                        | N    | LHR estimate | LHR SD  | LHR CI 5% | LHR CI 95% | LHR p-value | LHR FDR p-value | Lymphocyte counr | LC CI 5% | LC CI 95% | LC p-value | LC FDR p-value | ML prediction | Targets                                                                                                                                                                                                                                                                                                                                    |
|-------------|-----------------------------|------|--------------|---------|-----------|------------|-------------|-----------------|------------------|----------|-----------|------------|----------------|---------------|--------------------------------------------------------------------------------------------------------------------------------------------------------------------------------------------------------------------------------------------------------------------------------------------------------------------------------------------|
| DB00370     | Mirtazapine                 | 201  | 0.05217      | 0.15216 | -0.24605  | 0.35040    | 0.73168     | 0.85831         | -0.38123         | -0.01043 | 0.00705   | 0.70345    | 0.76659        | Yes           | HRH1 <sup>+</sup> , ADRA1A, ADRA1B, ADRA1D, ADRA2A, HTR2A, HTR2C, OPRK1                                                                                                                                                                                                                                                                    |
| DB00373     | Timolol                     | 254  | -0.21656     | 0.14751 | -0.50567  | 0.07255    | 0.14207     | 0.27512         | -0.37196         | -0.01184 | 0.00806   | 0.71004    | 0.76659        | No            | ADRB1, ADRB2                                                                                                                                                                                                                                                                                                                               |
| DB00381     | Amlodipine                  | 1250 | -0.27091     | 0.07289 | -0.41378  | -0.12804   | 0.00020     | 0.00190         | 1.84840          | -0.00020 | 0.00666   | 0.06479    | 0.14444        | Yes           | CACNA1B <sup>+</sup> , CA1, CACNA1C, CACNA1I, CACNA2D3, CACNB1, SMPD1                                                                                                                                                                                                                                                                      |
| DB00394     | Beclomethasone dipropionate | 792  | -0.36901     | 0.11319 | -0.59085  | -0.14717   | 0.00111     | 0.00849         | 4.15390          | 0.00594  | 0.01656   | 0.00004    | 0.00045        | No            | NR3C1                                                                                                                                                                                                                                                                                                                                      |
| DB00404     | Alprazolam                  | 557  | -0.00579     | 0.10444 | -0.21049  | 0.19891    | 0.95578     | 0.97596         | 3.28606          | 0.00368  | 0.01455   | 0.00109    | 0.00460        | Yes           | GABRA2 <sup>+</sup> , GABRA5 <sup>+</sup> , GABRA6 <sup>+</sup> , GABRA1, GABRA3, GABRA4, GABRB1, GABRB2, GABRB3, GABRD, GABRE, GABRG1, GABRG2, GABRG3, GABRP, GABRQ                                                                                                                                                                       |
| DB00421     | Spironolactone              | 272  | 0.12328      | 0.12368 | -0.11914  | 0.36569    | 0.31891     | 0.50226         | 0.44874          | -0.00510 | 0.00815   | 0.65401    | 0.75990        | Yes           | CACNG1 <sup>+</sup> , NR1I2 <sup>+</sup> , AR, CACNA1A, CACNA1B, CACNA1C, CACNA1D, CACNA1E, CACNA1F, CACNA1G, CACNA1H, CACNA1I, CACNA1S, CACNA2D1, CACNA2D2, CACNA2D3, CACNA2D4, CACNB1, CACNB2, CACNB3, CACNB4, CACNG2, CACNG3, CACNG4, CACNG5, CACNG6, CACNG7, CACNG8, CYP11B2, CYP17A1, NR3C1, NR3C2, PGR, SHBG, SRD5A1, SRD5A2, SRD5A3 |
| DB00425     | Zolpidem                    | 292  | -0.00952     | 0.13596 | -0.27599  | 0.25694    | 0.94415     | 0.97596         | 1.81929          | -0.00058 | 0.01460   | 0.07037    | 0.15332        | Yes           | GABRA2 <sup>+</sup> , GABRA1, GABRA3, GABRG2                                                                                                                                                                                                                                                                                               |
| DB00437     | Allopurinol                 | 511  | -0.06858     | 0.10105 | -0.26662  | 0.12947    | 0.49736     | 0.70555         | -0.61971         | -0.00671 | 0.00349   | 0.53579    | 0.66026        | No            | XDH                                                                                                                                                                                                                                                                                                                                        |
| DB00440     | Trimethoprim                | 161  | -0.10459     | 0.21128 | -0.51870  | 0.30951    | 0.62057     | 0.78589         | 2.43774          | 0.00277  | 0.02537   | 0.01575    | 0.04803        | No            |                                                                                                                                                                                                                                                                                                                                            |
| DB00448     | Lansoprazole                | 236  | -0.18294     | 0.15103 | -0.47895  | 0.11306    | 0.22577     | 0.38255         | -0.32776         | -0.01012 | 0.00721   | 0.74337    | 0.78862        | No            | ATP4A, MAPT                                                                                                                                                                                                                                                                                                                                |

| Drugbank ID | name            | N    | LHR estimate | LHR SD  | LHR CI 5% | LHR CI 95% | LHR p-value | LHR FDR p-value | Lymphocyte counr | LC CI 5% | LC CI 95% | LC p-value | LC FDR p-value | ML prediction | Targets                                                                                                                         |
|-------------|-----------------|------|--------------|---------|-----------|------------|-------------|-----------------|------------------|----------|-----------|------------|----------------|---------------|---------------------------------------------------------------------------------------------------------------------------------|
| DB00451     | Levothyroxine   | 396  | -0.22450     | 0.15086 | -0.52017  | 0.07118    | 0.13671     | 0.26902         | 2.26495          | 0.00109  | 0.01517   | 0.02414    | 0.06177        | Yes           | THRB <sup>+</sup> , ITGAV, ITGB3, THRA                                                                                          |
| DB00455     | Loratadine      | 251  | -0.36187     | 0.18521 | -0.72487  | 0.00112    | 0.05071     | 0.12890         | 1.33779          | -0.00295 | 0.01552   | 0.18172    | 0.33090        | Yes           | HRH1 <sup>+</sup> , KCNH2                                                                                                       |
| DB00502     | Haloperidol     | 206  | 0.03799      | 0.14360 | -0.24346  | 0.31945    | 0.79134     | 0.91130         | 1.85439          | -0.00042 | 0.01528   | 0.06511    | 0.14444        | No            | ADRA1A, ADRA2A, ADRA2B, ADRA2C, CHRM3, DRD1, DRD2, DRD3, GRIN2B, HRH1, HTR1A, HTR2A, HTR2C, HTR6, HTR7, MCHR1, SIGMAR1, SLC18A2 |
| DB00503     | Ritonavir       | 199  | -2.56715     | 1.01835 | -4.56309  | -0.57122   | 0.01171     | 0.04328         | 0.54421          | -0.00734 | 0.01298   | 0.58700    | 0.69528        | Yes           | NR1I2 <sup>+</sup>                                                                                                              |
| DB00537     | Ciprofloxacin   | 353  | 0.22127      | 0.11505 | -0.00423  | 0.44676    | 0.05445     | 0.13286         | 1.05222          | -0.00353 | 0.01174   | 0.29339    | 0.44189        | No            | KCNH2, TOP2A                                                                                                                    |
| DB00584     | Enalapril       | 1598 | -0.19957     | 0.06725 | -0.33138  | -0.06775   | 0.00300     | 0.01745         | 3.76049          | 0.00297  | 0.00945   | 0.00018    | 0.00103        | No            | ACE                                                                                                                             |
| DB00590     | Doxazosin       | 428  | -0.14507     | 0.11283 | -0.36622  | 0.07607    | 0.19853     | 0.35103         | 1.09164          | -0.00271 | 0.00953   | 0.27555    | 0.42021        | No            | ADRA1A, ADRA1B, ADRA1D, KCNH2, KCNH6, KCNH7                                                                                     |
| DB00612     | Bisoprolol      | 1409 | 0.03952      | 0.06188 | -0.08175  | 0.16080    | 0.52296     | 0.72502         | 0.45436          | -0.00261 | 0.00419   | 0.64965    | 0.75990        | No            | ADRB1, ADRB2                                                                                                                    |
| DB00628     | Clorazepic acid | 330  | -0.03228     | 0.12859 | -0.28432  | 0.21976    | 0.80180     | 0.91421         | 0.63151          | -0.00477 | 0.00934   | 0.52815    | 0.66026        | No            | GABRA1, GABRA2, GABRA3, GABRA4, GABRA5, GABRA6, GABRB1, GABRB2, GABRB3, GABRD, GABRE, GABRG1, GABRG2, GABRG3, GABRP, GABRQ      |
| DB00630     | Alendronic acid | 172  | -0.08885     | 0.18170 | -0.44496  | 0.26727    | 0.62485     | 0.78589         | 1.29554          | -0.00392 | 0.01921   | 0.19684    | 0.35316        | No            | ATP6V1A, FDPS, PTPN4, PTPRE, PTPRS                                                                                              |
| DB00635     | Prednisone      | 1818 | -0.35982     | 0.08332 | -0.52311  | -0.19652   | 0.00002     | 0.00018         | 5.43363          | 0.00644  | 0.01371   | 0.00000    | 0.00000        | No            | NR3C1                                                                                                                           |
| DB00641     | Simvastatin     | 1588 | -0.40558     | 0.07026 | -0.54328  | -0.26789   | 0.00000     | 0.00000         | 5.16632          | 0.00523  | 0.01163   | 0.00000    | 0.00001        | Yes           | ITGAL <sup>+</sup> , HDAC2, HMGCR                                                                                               |
| DB00646     | Nystatin        | 165  | -0.12519     | 0.20590 | -0.52875  | 0.27836    | 0.54317     | 0.73629         | -1.11099         | -0.01934 | 0.00540   | 0.26787    | 0.41897        | No            |                                                                                                                                 |
| DB00654     | Latanoprost     | 183  | 0.28492      | 0.14750 | -0.00418  | 0.57402    | 0.05341     | 0.13286         | -0.93373         | -0.01427 | 0.00483   | 0.35214    | 0.48271        | No            | PTGFR                                                                                                                           |
| DB00656     | Trazodone       | 468  | 0.17836      | 0.09654 | -0.01086  | 0.36758    | 0.06468     | 0.14985         | 0.26362          | -0.00534 | 0.00701   | 0.79221    | 0.81906        | Yes           | HRH1 <sup>+</sup> , SLC6A4 <sup>+</sup> , ADRA1A, ADRA2A, HTR1A, HTR2A, HTR2C                                                   |
| DB00678     | Losartan        | 1409 | -0.10898     | 0.06648 | -0.23928  | 0.02132    | 0.10114     | 0.21648         | 3.90438          | 0.00328  | 0.00991   | 0.00010    | 0.00073        | Yes           | AGTR1 <sup>+</sup>                                                                                                              |
| DB00695     | Furosemide      | 1920 | 0.24131      | 0.05212 | 0.13916   | 0.34346    | 0.00000     | 0.00005         | -3.74328         | -0.00805 | -0.00251  | 0.00019    | 0.00103        | No            | CA2, GPR35, SLC12A1                                                                                                             |

| Drugbank ID | name                  | N    | LHR estimate | LHR SD  | LHR CI 5% | LHR CI 95% | LHR p-value | LHR FDR p-value | Lymphocyte counr | LC CI 5% | LC CI 95% | LC p-value | LC FDR p-value | ML prediction | Targets                                                                                                                                                                                                                                                                   |
|-------------|-----------------------|------|--------------|---------|-----------|------------|-------------|-----------------|------------------|----------|-----------|------------|----------------|---------------|---------------------------------------------------------------------------------------------------------------------------------------------------------------------------------------------------------------------------------------------------------------------------|
| DB00706     | Tamsulosin            | 1080 | 0.19252      | 0.06766 | 0.05991   | 0.32513    | 0.00444     | 0.02209         | 0.96661          | -0.00185 | 0.00546   | 0.33397    | 0.46300        | No            | ADRA1A, ADRA1B, ADRA1D                                                                                                                                                                                                                                                    |
| DB00715     | Paroxetine            | 174  | -0.02896     | 0.19600 | -0.41311  | 0.35518    | 0.88252     | 0.95713         | 1.21415          | -0.00374 | 0.01596   | 0.22631    | 0.37346        | Yes           | SLC6A4 <sup>+</sup> , ADRA1A, ADRA1B, ADRA1D, ADRA2A, ADRA2B, ADRA2C, ADRB1, ADRB2, ADRB3, CHRM1, CHRM2, CHRM3, CHRM4, CHRM5, DRD1, DRD2, DRD5, HRH1, HTR1A, HTR1B, HTR1D, HTR1E, HTR1F, HTR2A, HTR2B, HTR2C, HTR3A, HTR3B, HTR3C, HTR3D, HTR3E, HTR4, HTR6, HTR7, SLC6A2 |
| DB00727     | Nitroglycerin         | 359  | 0.20588      | 0.11364 | -0.01684  | 0.42860    | 0.07002     | 0.15532         | -1.28181         | -0.01149 | 0.00239   | 0.20108    | 0.35553        | No            | NPR1                                                                                                                                                                                                                                                                      |
| DB00736     | Esomeprazole          | 277  | -0.26589     | 0.15735 | -0.57428  | 0.04251    | 0.09106     | 0.19839         | 1.55751          | -0.00180 | 0.01576   | 0.12041    | 0.24082        | No            | ATP4A, DDAH1                                                                                                                                                                                                                                                              |
| DB00758     | Clopidogrel           | 285  | 0.05387      | 0.12828 | -0.19754  | 0.30529    | 0.67450     | 0.81551         | -0.39382         | -0.00830 | 0.00552   | 0.69405    | 0.76659        | No            | P2RY12                                                                                                                                                                                                                                                                    |
| DB00766     | Clavulanic acid       | 779  | 0.03666      | 0.09079 | -0.14128  | 0.21461    | 0.68635     | 0.82093         | 1.03869          | -0.00255 | 0.00831   | 0.29945    | 0.44230        | No            |                                                                                                                                                                                                                                                                           |
| DB00788     | Naproxen              | 223  | -0.29150     | 0.21007 | -0.70324  | 0.12023    | 0.16525     | 0.30547         | 3.21950          | 0.00592  | 0.02428   | 0.00154    | 0.00625        | Yes           | PTGS2 <sup>+</sup> , PTGS1                                                                                                                                                                                                                                                |
| DB00796     | Candesartan cilexetil | 198  | -0.30312     | 0.19515 | -0.68561  | 0.07938    | 0.12037     | 0.24890         | 2.51961          | 0.00308  | 0.02457   | 0.01261    | 0.04049        | Yes           | AGTR1 <sup>+</sup>                                                                                                                                                                                                                                                        |
| DB00806     | Pentoxifylline        | 231  | -0.01548     | 0.13760 | -0.28517  | 0.25420    | 0.91040     | 0.96582         | -0.21323         | -0.00883 | 0.00709   | 0.83135    | 0.85231        | Yes           | NT5E <sup>+</sup> , ADORA1, ADORA2A                                                                                                                                                                                                                                       |
| DB00813     | Fentanyl              | 251  | 0.16883      | 0.12628 | -0.07868  | 0.41633    | 0.18124     | 0.32517         | 0.12960          | -0.00829 | 0.00949   | 0.89698    | 0.91193        | No            | ABCB1, OPRD1, OPRK1, OPRM1                                                                                                                                                                                                                                                |
| DB00828     | Fosfomycin            | 298  | -0.12532     | 0.14617 | -0.41181  | 0.16118    | 0.39127     | 0.57512         | 0.54516          | -0.00530 | 0.00942   | 0.58622    | 0.69528        | No            |                                                                                                                                                                                                                                                                           |
| DB00829     | Diazepam              | 641  | -0.41669     | 0.12112 | -0.65408  | -0.17930   | 0.00058     | 0.00473         | 2.16427          | 0.00057  | 0.01141   | 0.03084    | 0.07525        | Yes           | GABRA2 <sup>+</sup> , GABRA5 <sup>+</sup> , GABRD <sup>+</sup> , GABRA1, GABRA3, GABRA4, GABRA6, GABRB1, GABRB2, GABRB3, GABRE, GABRG1, GABRG2, GABRG3, GABRP, GABRQ                                                                                                      |
| DB00927     | Famotidine            | 207  | -0.19262     | 0.16794 | -0.52177  | 0.13653    | 0.25139     | 0.40892         | 0.57316          | -0.00725 | 0.01320   | 0.56698    | 0.68487        | No            | HRH2                                                                                                                                                                                                                                                                      |
| DB00938     | Salmeterol            | 279  | 0.00481      | 0.13478 | -0.25935  | 0.26897    | 0.97154     | 0.97596         | 1.15088          | -0.00355 | 0.01353   | 0.25073    | 0.40250        | No            | ADRB1, ADRB2, ADRB3                                                                                                                                                                                                                                                       |
| DB00945     | Acetylsalicylic acid  | 2127 | -0.19543     | 0.05548 | -0.30416  | -0.08670   | 0.00043     | 0.00372         | 1.40216          | -0.00080 | 0.00482   | 0.16103    | 0.30695        | Yes           | CASP1 <sup>+</sup> , CCND1 <sup>+</sup> , IKBKB <sup>+</sup> , MYC <sup>+</sup> , NFKBIA <sup>+</sup> , PTGS2 <sup>+</sup> ,                                                                                                                                              |

| Drugbank ID | name                | N    | LHR estimate | LHR SD  | LHR CI 5% | LHR CI 95% | LHR p-value | LHR FDR p-value | Lymphocyte counr | LC CI 5% | LC CI 95% | LC p-value | LC FDR p-value | ML prediction | Targets                                                                                                                                                                           |
|-------------|---------------------|------|--------------|---------|-----------|------------|-------------|-----------------|------------------|----------|-----------|------------|----------------|---------------|-----------------------------------------------------------------------------------------------------------------------------------------------------------------------------------|
|             |                     |      |              |         |           |            |             |                 |                  |          |           |            |                |               | RPS6KA3 <sup>+</sup> , AKR1C1, CASP3, EDNRA, HSPA5, MAPK1, MAPK15, MAPK3, MAPK4, MAPK6, MAPK7, PCNA, PRKAA1, PRKAA2, PRKAB1, PRKAB2, PRKAG1, PRKAG2, PRKAG3, PTGS1, TNFAIP6, TP53 |
| DB00966     | Telmisartan         | 226  | -0.09613     | 0.15655 | -0.40296  | 0.21070    | 0.53917     | 0.73629         | 1.25784          | -0.00308 | 0.01409   | 0.20987    | 0.36520        | Yes           | AGTR1 <sup>+</sup> , PPARG <sup>+</sup>                                                                                                                                           |
| DB00973     | Ezetimibe           | 344  | -0.16155     | 0.13076 | -0.41783  | 0.09473    | 0.21665     | 0.37227         | 1.86701          | -0.00040 | 0.01628   | 0.06262    | 0.14444        | Yes           | SOAT1 <sup>+</sup> , ANPEP, NPC1L1                                                                                                                                                |
| DB00983     | Formoterol          | 1380 | -0.37040     | 0.08596 | -0.53888  | -0.20192   | 0.00002     | 0.00018         | 5.13579          | 0.00650  | 0.01453   | 0.00000    | 0.00001        | No            | ADRB1, ADRB2, ADRB3                                                                                                                                                               |
| DB00986     | Glycopyrronium      | 196  | 0.20218      | 0.14234 | -0.07681  | 0.48116    | 0.15550     | 0.29187         | 0.40028          | -0.00780 | 0.01181   | 0.68940    | 0.76659        | No            | CHRM1, CHRM2, CHRM3                                                                                                                                                               |
| DB00999     | Hydrochlorothiazide | 2197 | -0.35148     | 0.06036 | -0.46979  | -0.23318   | 0.00000     | 0.00000         | 3.98046          | 0.00273  | 0.00802   | 0.00007    | 0.00067        | Yes           | KCNMA1 <sup>+</sup> , SLC12A3                                                                                                                                                     |
| DB01001     | Salbutamol          | 670  | -0.11964     | 0.10967 | -0.33459  | 0.09530    | 0.27528     | 0.44190         | 3.90623          | 0.00567  | 0.01710   | 0.00011    | 0.00073        | No            | ADRB1, ADRB2, ADRB3                                                                                                                                                               |
| DB01029     | Irbesartan          | 184  | -0.49710     | 0.21193 | -0.91248  | -0.08171   | 0.01900     | 0.06623         | 0.68108          | -0.00656 | 0.01359   | 0.49622    | 0.63725        | Yes           | AGTR1 <sup>+</sup> , JUN <sup>+</sup>                                                                                                                                             |
| DB01039     | Fenofibrate         | 244  | -0.53853     | 0.20520 | -0.94072  | -0.13635   | 0.00868     | 0.03309         | 1.49896          | -0.00196 | 0.01472   | 0.13512    | 0.26589        | Yes           | NR1I2 <sup>+</sup> , MMP25, PPARA                                                                                                                                                 |
| DB01050     | Ibuprofen           | 519  | -0.65959     | 0.20808 | -1.06743  | -0.25175   | 0.00153     | 0.01095         | 2.18280          | 0.00080  | 0.01503   | 0.02961    | 0.07372        | Yes           | BCL2 <sup>+</sup> , CFTR <sup>+</sup> , PPARG <sup>+</sup> , PTGS2 <sup>+</sup> , FABP2, GP1BA, PPARA, PTGS1, S100A7, THBD                                                        |
| DB01060     | Amoxicillin         | 1090 | 0.00515      | 0.07787 | -0.14746  | 0.15777    | 0.94725     | 0.97596         | 1.24767          | -0.00151 | 0.00681   | 0.21253    | 0.36520        | No            |                                                                                                                                                                                   |
| DB01068     | Clonazepam          | 167  | 0.07509      | 0.17917 | -0.27608  | 0.42627    | 0.67513     | 0.81551         | -0.11898         | -0.01232 | 0.01095   | 0.90540    | 0.91288        | Yes           | NR1I2 <sup>+</sup> , GABRA1, GABRA2, GABRA3, GABRA4, GABRA5, GABRA6, GABRB1, GABRB2, GABRB3, GABRD, GABRE, GABRG1, GABRG2, GABRG3, GABRP, GABRQ                                   |
| DB01076     | Atorvastatin        | 1112 | -0.08449     | 0.07355 | -0.22864  | 0.05966    | 0.25066     | 0.40892         | 1.14066          | -0.00164 | 0.00621   | 0.25429    | 0.40289        | Yes           | DPP4 <sup>+</sup> , AHR, HDAC2, HMGCR, NR1I3                                                                                                                                      |
| DB01098     | Rosuvastatin        | 314  | -0.30099     | 0.14942 | -0.59386  | -0.00813   | 0.04397     | 0.11921         | 1.02993          | -0.00378 | 0.01210   | 0.30385    | 0.44230        | No            | HMGCR, ITGAL                                                                                                                                                                      |
| DB01104     | Sertraline          | 359  | -0.00366     | 0.12135 | -0.24149  | 0.23418    | 0.97596     | 0.97596         | 2.98406          | 0.00362  | 0.01747   | 0.00303    | 0.01156        | Yes           | SLC6A4 <sup>+</sup> , PGRMC1, SIGMAR1, SLC29A4, SLC6A2, SLC6A3                                                                                                                    |
| DB01112     | Cefuroxime          | 352  | 0.06282      | 0.13187 | -0.19565  | 0.32129    | 0.63381     | 0.78903         | 1.21146          | -0.00280 | 0.01190   | 0.22652    | 0.37346        | No            |                                                                                                                                                                                   |



| Drugbank ID | name           | N    | LHR estimate | LHR SD  | LHR CI 5% | LHR CI 95% | LHR p-value | LHR FDR p-value | Lymphocyte counr | LC CI 5% | LC CI 95% | LC p-value | LC FDR p-value | ML prediction | Targets                                                                                                                                           |
|-------------|----------------|------|--------------|---------|-----------|------------|-------------|-----------------|------------------|----------|-----------|------------|----------------|---------------|---------------------------------------------------------------------------------------------------------------------------------------------------|
| DB01120     | Gliclazide     | 322  | -0.41723     | 0.15098 | -0.71315  | -0.12131   | 0.00572     | 0.02492         | 2.74039          | 0.00257  | 0.01549   | 0.00649    | 0.02262        | No            | ABCC8, VEGFA                                                                                                                                      |
| DB01126     | Dutasteride    | 547  | 0.16492      | 0.08814 | -0.00782  | 0.33766    | 0.06132     | 0.14668         | 1.42431          | -0.00139 | 0.00878   | 0.15492    | 0.30001        | Yes           | SRD5A1+, SRD5A2                                                                                                                                   |
| DB01136     | Carvedilol     | 370  | -0.03093     | 0.11715 | -0.26054  | 0.19868    | 0.79178     | 0.91130         | -0.99171         | -0.00925 | 0.00303   | 0.32204    | 0.45199        | Yes           | HIF1A+, ADRA1A, ADRA1B, ADRA1D, ADRA2A, ADRA2B, ADRA2C, ADRB1, ADRB2, GJA1, KCNH2, KCNJ2, KCNJ4, NDUFC2, NPPB, SELE, VCAM1, VEGFA                 |
| DB01137     | Levofloxacin   | 1052 | 0.03795      | 0.07490 | -0.10885  | 0.18475    | 0.61239     | 0.78589         | 3.76225          | 0.00391  | 0.01243   | 0.00018    | 0.00103        | No            |                                                                                                                                                   |
| DB01175     | Escitalopram   | 175  | 0.20050      | 0.16727 | -0.12734  | 0.52834    | 0.23066     | 0.38549         | 2.89171          | 0.00553  | 0.02885   | 0.00436    | 0.01613        | Yes           | HRH1+, SLC6A4+, ADRA1A, ADRA1B, ADRA1D, ADRA2A, ADRA2B, ADRA2C, CHRM1, DRD2, HTR1A, HTR2A, HTR2C, SLC6A2, SLC6A3                                  |
| DB01184     | Domperidone    | 226  | 0.13252      | 0.14828 | -0.15811  | 0.42315    | 0.37149     | 0.55270         | 1.64601          | -0.00154 | 0.01740   | 0.10098    | 0.20881        | No            | DRD2, DRD3                                                                                                                                        |
| DB01222     | Budesonide     | 1047 | -0.25260     | 0.08800 | -0.42508  | -0.08012   | 0.00410     | 0.02174         | 3.28003          | 0.00289  | 0.01151   | 0.00108    | 0.00460        | No            | ANXA1, NR3C1                                                                                                                                      |
| DB01225     | Enoxaparin     | 3237 | -1.20921     | 0.10316 | -1.41141  | -1.00702   | 0.00000     | 0.00000         | 11.31073         | 0.01233  | 0.01750   | 0.00000    | 0.00000        | No            | F10, SERPINC1                                                                                                                                     |
| DB01233     | Metoclopramide | 498  | 0.05646      | 0.12341 | -0.18542  | 0.29835    | 0.64729     | 0.79767         | 2.38020          | 0.00145  | 0.01496   | 0.01767    | 0.05002        | Yes           | HTR4+, CHRM1, DRD2, HTR3A                                                                                                                         |
| DB01234     | Dexamethasone  | 2469 | -0.75679     | 0.10273 | -0.95813  | -0.55545   | 0.00000     | 0.00000         | 9.42789          | 0.01233  | 0.01881   | 0.00000    | 0.00000        | Yes           | NR1I2+, ANXA1, NOS2, NR0B1, NR3C1                                                                                                                 |
| DB01261     | Sitagliptin    | 448  | -0.36512     | 0.12515 | -0.61040  | -0.11984   | 0.00353     | 0.01956         | 2.56016          | 0.00179  | 0.01355   | 0.01077    | 0.03552        | Yes           | DPP4+                                                                                                                                             |
| DB01306     | Insulin aspart | 214  | -0.33848     | 0.18350 | -0.69814  | 0.02117    | 0.06510     | 0.14985         | 2.04618          | 0.00041  | 0.01859   | 0.04196    | 0.10038        | No            | IGF1R, INSR                                                                                                                                       |
| DB01373     | Calcium        | 641  | -0.30728     | 0.10895 | -0.52082  | -0.09375   | 0.00480     | 0.02250         | 3.75161          | 0.00479  | 0.01529   | 0.00019    | 0.00103        | Yes           | ALPP+, CAST+, COMP+, PCDH19+, PDCD6+, S100A8+, S100B+, AOC1, ATP2C1, BMP4, CACNA1C, CALM3, CP, MGP, S100A13, S100A2, S100A9, SPTBN1, TNNC1, TNNC2 |
| DB01409     | Tiotropium     | 449  | -0.01915     | 0.10911 | -0.23299  | 0.19470    | 0.86068     | 0.95458         | 0.43126          | -0.00476 | 0.00746   | 0.66649    | 0.76088        | No            | CHRM1, CHRM2, CHRM3, CHRM4, CHRM5                                                                                                                 |
| DB01418     | Acenocoumarol  | 511  | 0.17844      | 0.08974 | 0.00254   | 0.35433    | 0.04678     | 0.12407         | -0.74581         | -0.00788 | 0.00353   | 0.45615    | 0.59670        | No            | VKORC1                                                                                                                                            |

| Drugbank ID | name                | N    | LHR estimate | LHR SD  | LHR CI 5% | LHR CI 95% | LHR p-value | LHR FDR p-value | Lymphocyte counr | LC CI 5% | LC CI 95% | LC p-value | LC FDR p-value | ML prediction | Targets                                                                                                                                                                            |
|-------------|---------------------|------|--------------|---------|-----------|------------|-------------|-----------------|------------------|----------|-----------|------------|----------------|---------------|------------------------------------------------------------------------------------------------------------------------------------------------------------------------------------|
| DB01558     | Bromazepam          | 471  | -0.11470     | 0.11560 | -0.34127  | 0.11188    | 0.32112     | 0.50226         | 2.71790          | 0.00234  | 0.01446   | 0.00682    | 0.02312        | Yes           | GABRA2 <sup>+</sup> , GABRA5 <sup>+</sup> , GABRA6 <sup>+</sup> , GABRD <sup>+</sup> , GABRA1, GABRA3, GABRA4, GABRB1, GABRB2, GABRB3, GABRE, GABRG1, GABRG2, GABRG3, GABRP, GABRQ |
| DB01592     | Iron                | 959  | 0.07574      | 0.07736 | -0.07588  | 0.22736    | 0.32752     | 0.50579         | -1.34037         | -0.00790 | 0.00148   | 0.18047    | 0.33090        | Yes           | FEN1 <sup>+</sup> , AHSP, CP, EGLN1, FTH1, FXN, HBA1, HDAC8, NEIL1, NEIL2, POLB, TF, TFRC                                                                                          |
| DB01601     | Lopinavir           | 185  | -2.47282     | 1.01507 | -4.46233  | -0.48332   | 0.01485     | 0.05327         | 1.00651          | -0.00511 | 0.01591   | 0.31573    | 0.45199        | No            |                                                                                                                                                                                    |
| DB01611     | Hydroxychloroquine  | 320  | -1.17992     | 0.31635 | -1.79995  | -0.55988   | 0.00019     | 0.00190         | -0.28913         | -0.00963 | 0.00729   | 0.77293    | 0.81291        | Yes           | TLR7 <sup>+</sup> , ACE2, TLR9                                                                                                                                                     |
| DB04817     | Metamizole          | 2843 | -0.06400     | 0.05075 | -0.16347  | 0.03546    | 0.20723     | 0.36117         | 4.06537          | 0.00267  | 0.00763   | 0.00005    | 0.00055        | No            | PTGS1                                                                                                                                                                              |
| DB04876     | Vildagliptin        | 200  | -0.13189     | 0.16107 | -0.44757  | 0.18379    | 0.41287     | 0.59965         | 2.38357          | 0.00176  | 0.01809   | 0.01804    | 0.05002        | Yes           | DPP4 <sup>+</sup>                                                                                                                                                                  |
| DB06228     | Rivaroxaban         | 200  | -0.09436     | 0.16292 | -0.41368  | 0.22497    | 0.56249     | 0.75411         | 0.77397          | -0.00583 | 0.01340   | 0.43986    | 0.58970        | No            | F10                                                                                                                                                                                |
| DB06292     | Dapagliflozin       | 229  | -0.35373     | 0.19329 | -0.73256  | 0.02510    | 0.06724     | 0.15191         | 2.50511          | 0.00236  | 0.01940   | 0.01312    | 0.04105        | No            | SLC5A2                                                                                                                                                                             |
| DB06605     | Apixaban            | 345  | -0.01609     | 0.11841 | -0.24817  | 0.21599    | 0.89191     | 0.95713         | 0.74036          | -0.00432 | 0.00955   | 0.45975    | 0.59670        | No            | F10                                                                                                                                                                                |
| DB06698     | Betahistine         | 409  | -0.01532     | 0.11542 | -0.24154  | 0.21089    | 0.89437     | 0.95713         | 1.38293          | -0.00188 | 0.01093   | 0.16755    | 0.31447        | Yes           | HRH1 <sup>+</sup> , HRH3                                                                                                                                                           |
| DB08810     | Cinitapride         | 210  | -0.04103     | 0.17829 | -0.39046  | 0.30840    | 0.81799     | 0.92402         | 2.41071          | 0.00217  | 0.02098   | 0.01681    | 0.05002        | No            | HTR1A, HTR2A, HTR4                                                                                                                                                                 |
| DB08882     | Linagliptin         | 306  | 0.17434      | 0.11700 | -0.05498  | 0.40366    | 0.13620     | 0.26902         | -0.43021         | -0.00919 | 0.00588   | 0.66733    | 0.76088        | Yes           | DPP4 <sup>+</sup>                                                                                                                                                                  |
| DB08906     | Fluticasone furoate | 662  | -0.20888     | 0.10361 | -0.41196  | -0.00580   | 0.04381     | 0.11921         | 4.00962          | 0.00547  | 0.01595   | 0.00007    | 0.00067        | No            | NR3C1, NR3C2, PGR                                                                                                                                                                  |
| DB09038     | Empagliflozin       | 239  | -0.42376     | 0.18355 | -0.78352  | -0.06401   | 0.02096     | 0.06730         | 2.26829          | 0.00126  | 0.01714   | 0.02430    | 0.06177        | No            | SLC5A2                                                                                                                                                                             |
| DB09082     | Vilanterol          | 328  | -0.20516     | 0.14917 | -0.49754  | 0.08722    | 0.16904     | 0.30780         | 2.28033          | 0.00124  | 0.01648   | 0.02336    | 0.06177        | No            | ADRB2                                                                                                                                                                              |
| DB09153     | Sodium chloride     | 381  | -0.29602     | 0.13845 | -0.56739  | -0.02466   | 0.03251     | 0.09443         | 0.62571          | -0.00479 | 0.00929   | 0.53189    | 0.66026        | No            |                                                                                                                                                                                    |
| DB09154     | Sodium citrate      | 272  | -0.41841     | 0.18019 | -0.77158  | -0.06523   | 0.02023     | 0.06703         | 0.88022          | -0.00453 | 0.01193   | 0.37952    | 0.51446        | No            |                                                                                                                                                                                    |
| DB09214     | Dexketoprofen       | 327  | -0.25471     | 0.17102 | -0.58990  | 0.08048    | 0.13639     | 0.26902         | 1.02841          | -0.00427 | 0.01369   | 0.30453    | 0.44230        | Yes           | PTGS2 <sup>+</sup> , PTGS1                                                                                                                                                         |
| DB09238     | Manidipine          | 160  | -0.13985     | 0.18858 | -0.50945  | 0.22975    | 0.45832     | 0.65782         | -0.34343         | -0.01189 | 0.00835   | 0.73174    | 0.78309        | No            | CACNA1A, CACNA1C, CACNA1D, CACNA1F, CACNA1G, CACNA1H, CACNA1I, CACNA1S, CACNB1, CACNB2, CACNB3, CACNB4                                                                             |

| Drugbank ID | name                       | N   | LHR estimate | LHR SD  | LHR CI 5% | LHR CI 95% | LHR p-value | LHR FDR p-value | Lymphocyte counr | LC CI 5% | LC CI 95% | LC p-value | LC FDR p-value | ML prediction | Targets                                                                                                                                                |
|-------------|----------------------------|-----|--------------|---------|-----------|------------|-------------|-----------------|------------------|----------|-----------|------------|----------------|---------------|--------------------------------------------------------------------------------------------------------------------------------------------------------|
| DB09341     | Dextrose, unspecified form | 311 | -0.37999     | 0.16377 | -0.70099  | -0.05900   | 0.02033     | 0.06703         | 0.75441          | -0.00458 | 0.01031   | 0.45117    | 0.59670        | No            |                                                                                                                                                        |
| DB11921     | Deflazacort                | 629 | -0.06549     | 0.10221 | -0.26581  | 0.13482    | 0.52164     | 0.72502         | 3.82838          | 0.00522  | 0.01618   | 0.00014    | 0.00092        | No            | NR3C1                                                                                                                                                  |
| DB13872     | Lormetazepam               | 806 | 0.15230      | 0.07786 | -0.00029  | 0.30490    | 0.05044     | 0.12890         | 0.37198          | -0.00367 | 0.00540   | 0.71001    | 0.76659        | Yes           | GABRA2 <sup>+</sup> , GABRA5 <sup>+</sup> , GABRA1, GABRA3, GABRA4, GABRA6, GABRB1, GABRB2, GABRB3, GABRD, GABRE, GABRG1, GABRG2, GABRG3, GABRP, GABRQ |
| DB14500     | Potassium                  | 352 | -0.34762     | 0.15244 | -0.64641  | -0.04884   | 0.02259     | 0.06911         | 0.27568          | -0.00602 | 0.00798   | 0.78296    | 0.81642        | No            | ATP1A1                                                                                                                                                 |
| DB14761     | Remdesivir                 | 190 | -0.03958     | 0.20608 | -0.44348  | 0.36432    | 0.84768     | 0.94878         | 1.57875          | -0.00178 | 0.01610   | 0.11603    | 0.23592        | No            |                                                                                                                                                        |
